# Supplementary material for: Potent HIV-1 protease inhibitors incorporating meso-bicyclic urethanes as P2-ligands: structure-based design, synthesis, biological evaluation and protein–ligand X-ray studies
Source: Royal Society of Chemistry journal article supplement (doi:10.1039/b809178a), 2008-01-01
Supplement: b809178a.pdf [file b809178a.pdf]

S1

**Electronic Supporting Information (ESI) for: Potent HIV-1  
Protease Inhibitors Incorporating meso-Bicyclic Urethanes as  
P2-ligands: Structure-Based Design, Synthesis, Biological  
Evaluation and Protein-Ligand X-Ray Studies**

**Arun K. Ghosh,<sup>\*a</sup> Sandra Gemma,<sup>a</sup> Jun Takayama,<sup>a</sup> Abigail Baldrige,<sup>a</sup> Sofiya  
Leshchenko-Yashchuk,<sup>a</sup> Heather B Miller,<sup>a</sup> Yuan-Fang Wang,<sup>b</sup> Andrey Yu. Kovalevsky,<sup>b</sup>  
Yashiro Koh,<sup>c</sup> Irene T. Weber,<sup>b</sup> and Hiroaki Mitsuya<sup>c</sup>**

HPLC (Table 1SI) and HRMS (Table 2SI) data of inhibitors **2,3, 26-30**. Crystallographic  
Data Collection and Refinement Statistics (Table 3SI).

**Table 1.** Purity of inhibitors **2,3, 26-30**

| <b>Inhibitor</b> | <b>Solvent system<sup>a</sup></b> | <b>Retention Time (min)</b> | <b>Purity (%)</b> | <b>Column</b>                    | <b>Flow rate (mL/Min)</b> |
|------------------|-----------------------------------|-----------------------------|-------------------|----------------------------------|---------------------------|
| <b>2</b>         | A                                 | 12.2                        | 99%               | XDB-C18 5 $\mu$ M<br>4.6 x 150mm | 2.0                       |
|                  | B                                 | 14.3                        | 99%               | XDB-C18 5 $\mu$ M<br>4.6 x 150mm | 2.0                       |
| <b>3</b>         | A                                 | 12.1                        | 99%               | XDB-C18 5 $\mu$ M<br>4.6 x 150mm | 2.0                       |
|                  | C                                 | 12.8                        | 99%               | XDB-C18 5 $\mu$ M<br>4.6 x 150mm | 2.0                       |
| <b>26</b>        | A                                 | 12.6                        | 99%               | XDB-C18 5 $\mu$ M<br>4.6 x 150mm | 2.0                       |
|                  | B                                 | 14.6                        | 98%               | XDB-C18 5 $\mu$ M<br>4.6 x 150mm | 2.0                       |
| <b>27</b>        | A                                 | 12.1                        | 96%               | XDB-C18 5 $\mu$ M<br>4.6 x 150mm | 2.0                       |
|                  | C                                 | 12.7                        | 97%               | XDB-C18 5 $\mu$ M<br>4.6 x 150mm | 2.0                       |
| <b>28</b>        | A                                 | 12.2                        | 98%               | XDB-C18 5 $\mu$ M<br>4.6 x 150mm | 2.0                       |
|                  | C                                 | 12.7                        | 98%               | XDB-C18 5 $\mu$ M<br>4.6 x 150mm | 2.0                       |
| <b>29</b>        | A                                 | 12.3                        | 98%               | XDB-C18 5 $\mu$ M<br>4.6 x 150mm | 2.0                       |
|                  | C                                 | 12.9                        | 99%               | XDB-C18 5 $\mu$ M<br>4.6 x 150mm | 2.0                       |
| <b>30</b>        | A                                 | 9.7                         | 98%               | XDB-C18 5 $\mu$ M<br>4.6 x 150mm | 2.0                       |
|                  | C                                 | 11.4                        | 99%               | XDB-C18 5 $\mu$ M<br>4.6 x 150mm | 2.0                       |

<sup>a</sup>A= linear gradient from 20% acetonitrile, 80% water containing 0.05% trifluoroacetic acid to 80% acetonitrile, 20% water containing 0.05% trifluoroacetic acid in 20 min. B= linear gradient from 20% methanol, 80% water containing 0.05% trifluoroacetic acid to 80% MeOH in 20 min. C = linear gradient from 20% methanol, 80% water containing 0.05% trifluoroacetic acid to 100% MeOH in 20 min.

**Table 2.** HRMS for inhibitors **2,3, 26-30**

| Inhibitor | HRMS                                                                                                                                         |
|-----------|----------------------------------------------------------------------------------------------------------------------------------------------|
| <b>2</b>  | HRMS ( <i>m/z</i> ) calcd for C <sub>28</sub> H <sub>39</sub> N <sub>2</sub> O <sub>8</sub> S [M+H <sup>+</sup> ] 563.2427, found 563.2406   |
| <b>3</b>  | HRMS ( <i>m/z</i> ) calcd for C <sub>29</sub> H <sub>40</sub> N <sub>2</sub> NaO <sub>8</sub> S [M+Na] <sup>+</sup> 599.2403, found 599.2394 |
| <b>26</b> | HRMS ( <i>m/z</i> ) calcd for C <sub>28</sub> H <sub>38</sub> N <sub>2</sub> NaO <sub>8</sub> S [M+Na] <sup>+</sup> 585.2247, found 585.2229 |
| <b>27</b> | HRMS ( <i>m/z</i> ) calcd for C <sub>29</sub> H <sub>40</sub> N <sub>2</sub> NaO <sub>9</sub> S [M+Na] <sup>+</sup> 615.2353, found 615.2361 |
| <b>28</b> | HRMS ( <i>m/z</i> ) calcd for C <sub>29</sub> H <sub>40</sub> N <sub>2</sub> NaO <sub>9</sub> S [M+Na] <sup>+</sup> 615.2353, found 615.2349 |
| <b>29</b> | HRMS ( <i>m/z</i> ) calcd for C <sub>29</sub> H <sub>40</sub> N <sub>2</sub> NaO <sub>8</sub> S [M+Na] <sup>+</sup> 599.2403, found 599.2421 |
| <b>30</b> | HRMS ( <i>m/z</i> ) calcd for C <sub>28</sub> H <sub>38</sub> N <sub>2</sub> NaO <sub>8</sub> S [M+Na] <sup>+</sup> 585.2247, found 585.2246 |

**Table 3.** Crystallographic Data Collection and Refinement Statistics

|                                                |                                  |
|------------------------------------------------|----------------------------------|
| Space group                                    | P2 <sub>1</sub> 2 <sub>1</sub> 2 |
| Unit cell dimensions: (Å)                      |                                  |
| a                                              | 58.00                            |
| b                                              | 86.34                            |
| c                                              | 45.83                            |
| Resolution range (Å)                           | 50-1.07                          |
| Unique reflections                             | 90,315                           |
| R <sub>merge</sub> (%) overall (final shell)   | 7.0 (41.8)                       |
| I/σ(I) overall (final shell)                   | 14.6(2.1)                        |
| Completeness (%) overall (final shell)         | 88.1 (51.3)                      |
| Data range for refinement (Å)                  | 10-1.07                          |
| R (%)                                          | 15.2                             |
| R <sub>free</sub> (%)                          | 17.7                             |
| No. of solvent atoms (total occupancies)       | 162.9                            |
| RMS deviation from ideality                    |                                  |
| Bonds (Å)                                      | 0.015                            |
| Angle distance (Å)                             | 0.034                            |
| Average B-factors (Å <sup>2</sup> )            |                                  |
| Main-chain atoms                               | 13.1                             |
| Side-chain atoms                               | 18.2                             |
| Inhibitor                                      | 12.5                             |
| Solvent                                        | 24.0                             |
| Residual density (max/min) (eÅ <sup>-3</sup> ) | 0.38/-0.28                       |
